# Supplementary material
Source: PubMed Central journal article supplement (PMC7149362)
Supplement: jamaneurol-77-683-s001.pdf [file jamaneurol-77-683-s001.pdf]

## Supplementary Online Content

Mao L, Jin H, Wang M, et al. Neurologic manifestations of hospitalized patients with coronavirus disease 2019 in Wuhan, China. *JAMA Neurol*. Published online April 10, 2020. doi:10.1001/jamaneurol.2020.1127

**eTable.** Laboratory findings of COVID-19 patients with skeletal muscle injury

This supplementary material has been provided by the authors to give readers additional information about their work.

**eTable 1. Laboratory findings of COVID-19 patients with skeletal muscle injury**

| Median<br>(range)                           | Total                              |                                        |          | Severe                             |                                       |          | Nonsevere                         |                                        |          |
|---------------------------------------------|------------------------------------|----------------------------------------|----------|------------------------------------|---------------------------------------|----------|-----------------------------------|----------------------------------------|----------|
|                                             | With skeletal muscle injury (n=23) | Without skeletal muscle injury (n=191) | <i>P</i> | With skeletal muscle injury (n=17) | Without skeletal muscle injury (n=71) | <i>P</i> | With skeletal muscle injury (n=6) | Without skeletal muscle injury (n=120) | <i>P</i> |
| Creatine kinase, U/L                        | 400.0<br>(203.0-12216.0)           | 58.5<br>(8.8-212.0)                    | <0.001   | 525.0<br>(203.0-12216.0)           | 64.0<br>(8.8-212.0)                   | <0.001   | 231.0<br>(206.0-1260.0)           | 57.5<br>(19.0-184.0)                   | <0.001   |
| White blood cell count, ×10 <sup>9</sup> /L | 6.0<br>(2.3-20.4)                  | 4.8<br>(0.1-15.6)                      | 0.248    | 6.7<br>(2.3-20.4)                  | 5.2<br>(0.1-15.6)                     | 0.269    | 4.3<br>(2.4-6.1)                  | 4.5<br>(1.8-14.0)                      | 0.618    |
| Neutrophil count, ×10 <sup>9</sup> /L       | 4.3<br>(0.9-18.7)                  | 2.9<br>(0.0-13.0)                      | 0.031    | 5.5<br>(0.9-18.7)                  | 3.5<br>(0.0-13.0)                     | 0.076    | 2.6<br>(1.1-4.5)                  | 2.6<br>(0.7-11.8)                      | 0.945    |
| Lymphocyte count, ×10 <sup>9</sup> /L       | 0.9<br>(0.1-2.6)                   | 1.2<br>(0.1-2.6)                       | 0.002    | 0.8<br>(0.1-2.6)                   | 0.9<br>(0.1-2.5)                      | 0.044    | 1.2<br>(1.0-2.1)                  | 1.3<br>(0.4-2.6)                       | 0.846    |
| Platelet count, ×10 <sup>9</sup> /L         | 185.0<br>(82.0-436.0)              | 215.0<br>(18.0-583.0)                  | 0.224    | 182.0<br>(82.0-436.0)              | 209.0<br>(18.0-576.0)                 | 0.407    | 223.0<br>(122.0-304.0)            | 219.0<br>(42.0-583.0)                  | 0.688    |
| C-reactive protein, mg/L                    | 56.0<br>(0.1-212.0)                | 11.1<br>(0.1-204.5)                    | <0.001   | 70.8<br>(0.1-212.0)                | 21.0<br>(0.1-204.5)                   | 0.078    | 18.1<br>(9.7-126.0)               | 8.1<br>(0.4-123.0)                     | 0.033    |
| D-dimer, mg/L                               | 1.3<br>(0.2-20.0)                  | 0.5<br>(0.1-20.0)                      | 0.01     | 1.7<br>(0.2-20.0)                  | 0.6<br>(0.1-20.0)                     | 0.120    | 0.4<br>(0.2-1.3)                  | 0.4<br>(0.2-8.7)                       | 0.679    |
| Lactate dehydrogenase, U/L                  | 415.0<br>(147.0-743.0)             | 229.0<br>(2.2-908.0)                   | <0.001   | 442.0<br>(147.0-743.0)             | 285.0<br>(2.2-880.0)                  | 0.002    | 315.0                             | 213.0<br>(2.5-908.0)                   | 0.035    |

|                                 |                       |                       |        |                       |                       |        |                       |                      |       |
|---------------------------------|-----------------------|-----------------------|--------|-----------------------|-----------------------|--------|-----------------------|----------------------|-------|
|                                 |                       |                       |        |                       |                       |        | (210.0<br>-<br>666.0) |                      |       |
| Alanine aminotransferase, U/L   | 44.0<br>(14.0-173.0)  | 25.0<br>(5.0-1933.0)  | 0.007  | 50.0<br>(14.0-173.0)  | 30.0<br>(5.0-1933.0)  | 0.02   | 28.0<br>(16.0-63.0)   | 23.0<br>(6.0-261.0)  | 0.495 |
| Aspartate aminotransferase, U/L | 46.0<br>(22.0-209.0)  | 25.0<br>(8.0-8191.0)  | <0.001 | 53.0<br>(26.0-209.0)  | 31.0<br>(8.0-8191.0)  | <0.001 | 34.5<br>(22.0-60.0)   | 23.0<br>(9.0-244.0)  | 0.065 |
| Blood urea nitrogen, mmol/L     | 4.8<br>(2.0-48.1)     | 4.1<br>(1.5-19.1)     | 0.011  | 4.8<br>(2.4-48.1)     | 4.6<br>(1.5-19.1)     | 0.256  | 5.9<br>(2.0-10.6)     | 3.8<br>(1.6-13.7)    | 0.264 |
| Creatinine, $\mu$ mol/L         | 80.5<br>(43.7-1299.2) | 66.9<br>(35.9-9435.0) | 0.001  | 81.5<br>(43.7-1299.2) | 68.4<br>(35.9-9435.0) | 0.03   | 77.4<br>(60.7-229.1)  | 65.1<br>(39.4-215.3) | 0.050 |

*P* values indicate differences between patients with and without skeletal muscle injury. *P*<0.05 was considered statistically significant.
